# Supplementary material for: Tb II-I, a Fraction Isolated from Tityus bahiensis Scorpion Venom, Alters Cytokines’: Level and Induces Seizures When Intrahippocampally Injected in Rats
Source: PubMed Central journal article supplement (PMC6024361; doi:10.3390/toxins10060250), 2018-06-19
Supplement: toxins-10-00250-s001.pdf [file toxins-10-00250-s001.pdf]

## Supplementary Materials: Tb II-I, a fraction isolated from *Tityus bahiensis* scorpion venom, alters cytokines level and induces seizures when intrahippocampally injected in rats

Emidio Beraldo Neto, Douglas O. C. Mariano, Lucas A. Freitas, Ana L. C. Dorce, Adriana N. Martins, Daniel C. Pimenta, Fernanda C. V. Portaro, Daniela C. Carvalho, Valquiria A. C. Dorce and Ana L. A. Nencioni

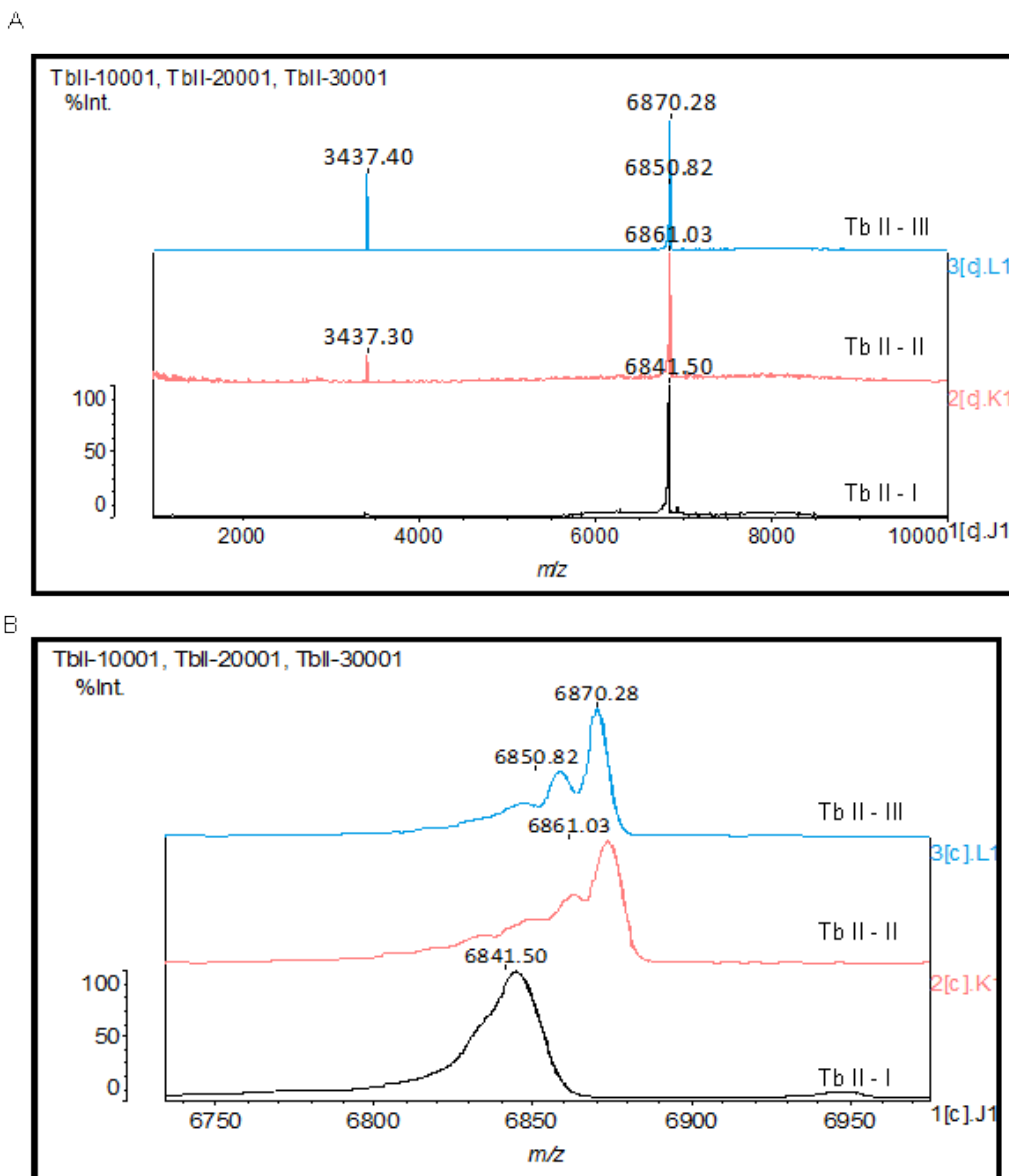

**Figure S1.** MALDI-TOF/MS profile of Tb II-I, Tb II-II and Tb II-III fractions. (A) It was possible to observe an intense peak around 6800 – 6900 m/z in all three fractions. Besides, the ion 3437 in fraction Tb II-II and Tb II-III is the double charged ion  $[M + 2H]^{2+}$  of 6870 m/z. (B) After to limit the mass range between 6750 – 6950 m/z, it was possible to observe the presence of 2 – 3 peaks in Tb II-II and Tb II-III, respectively, with middle to higher intensity. Instead of it, only Tb II-I shows one intensity peak at this mass range.

A

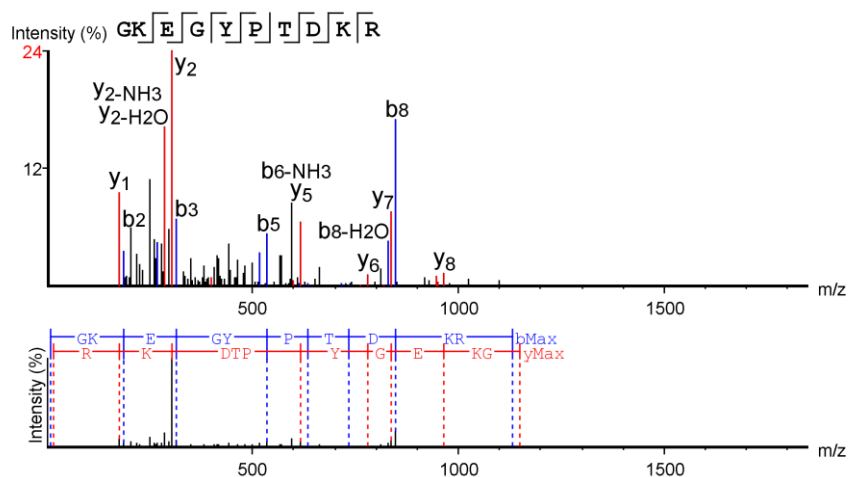

B

| #  | b      | b-H <sub>2</sub> O | b-NH <sub>3</sub> | b (2+) | Seq | y       | y-H <sub>2</sub> O | y-NH <sub>3</sub> | y (2+) | #  |
|----|--------|--------------------|-------------------|--------|-----|---------|--------------------|-------------------|--------|----|
| 1  | 58.03  | 40.02              | 41.00             | 29.51  | G   |         |                    |                   |        | 10 |
| 2  | 186.14 | 168.11             | 169.10            | 93.56  | K   | 1093.56 | 1075.55            | 1076.54           | 547.28 | 9  |
| 3  | 315.16 | 297.16             | 298.14            | 158.08 | E   | 965.47  | 947.50             | 948.43            | 483.23 | 8  |
| 4  | 372.19 | 354.18             | 355.16            | 186.59 | G   | 836.42  | 818.38             | 819.46            | 418.71 | 7  |
| 5  | 535.27 | 517.22             | 518.23            | 268.19 | Y   | 779.39  | 761.49             | 762.38            | 390.20 | 6  |
| 6  | 632.28 | 614.24             | 615.33            | 316.65 | P   | 616.34  | 598.35             | 599.34            | 308.67 | 5  |
| 7  | 733.27 | 715.34             | 716.27            | 367.18 | T   | 519.29  | 501.28             | 502.26            | 260.14 | 4  |
| 8  | 848.37 | 830.39             | 831.35            | 424.69 | D   | 418.24  | 400.23             | 401.20            | 209.62 | 3  |
| 9  | 976.47 | 958.46             | 959.45            | 488.74 | K   | 303.22  | 285.21             | 286.19            | 152.11 | 2  |
| 10 |        |                    |                   |        | R   | 175.13  | 157.11             | 158.09            | 88.06  | 1  |

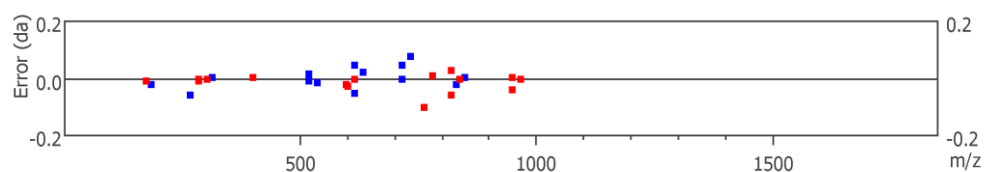

C

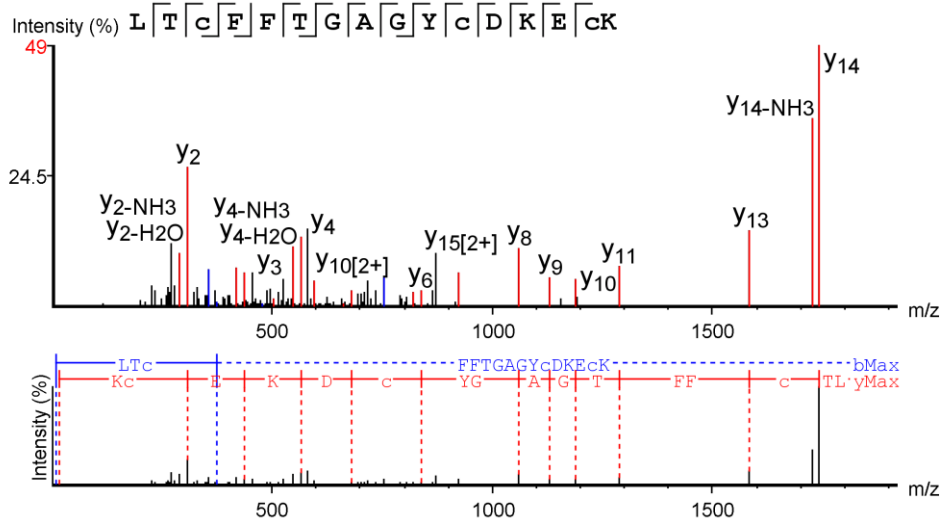

D

| #  | b       | b-H2O   | b-NH3   | b (2+) | Seq       | y       | y-H2O   | y-NH3   | y (2+) | #  |
|----|---------|---------|---------|--------|-----------|---------|---------|---------|--------|----|
| 1  | 114.09  | 96.08   | 97.06   | 57.55  | L         |         |         |         |        | 16 |
| 2  | 215.14  | 197.13  | 198.11  | 108.07 | T         | 1843.74 | 1825.73 | 1826.72 | 922.37 | 15 |
| 3  | 375.17  | 357.19  | 358.14  | 188.09 | C(+57.02) | 1742.70 | 1724.69 | 1725.69 | 871.85 | 14 |
| 4  | 522.24  | 504.15  | 505.21  | 261.62 | F         | 1582.66 | 1564.66 | 1565.64 | 791.83 | 13 |
| 5  | 669.31  | 651.30  | 652.28  | 335.15 | F         | 1435.60 | 1417.59 | 1418.57 | 718.30 | 12 |
| 6  | 770.35  | 752.35  | 753.27  | 385.68 | T         | 1288.49 | 1270.52 | 1271.50 | 644.76 | 11 |
| 7  | 827.38  | 809.37  | 810.35  | 414.19 | G         | 1187.47 | 1169.47 | 1170.45 | 594.24 | 10 |
| 8  | 898.41  | 880.40  | 881.39  | 449.71 | A         | 1130.44 | 1112.45 | 1113.43 | 565.73 | 9  |
| 9  | 955.43  | 937.42  | 938.41  | 478.21 | G         | 1059.37 | 1041.41 | 1042.40 | 530.21 | 8  |
| 10 | 1118.50 | 1100.49 | 1101.47 | 559.75 | Y         | 1002.40 | 984.39  | 985.37  | 501.71 | 7  |
| 11 | 1278.53 | 1260.52 | 1261.50 | 639.76 | C(+57.02) | 839.34  | 821.37  | 822.31  | 420.12 | 6  |
| 12 | 1393.56 | 1375.55 | 1376.53 | 697.28 | D         | 679.29  | 661.29  | 662.28  | 340.15 | 5  |
| 13 | 1521.65 | 1503.64 | 1504.62 | 761.33 | K         | 564.27  | 546.23  | 547.12  | 282.64 | 4  |
| 14 | 1650.69 | 1632.68 | 1633.67 | 825.85 | E         | 436.24  | 418.17  | 419.17  | 218.59 | 3  |
| 15 | 1810.72 | 1792.71 | 1793.70 | 905.86 | C(+57.02) | 307.12  | 289.13  | 290.02  | 154.07 | 2  |
| 16 |         |         |         |        | K         | 147.11  | 129.10  | 130.09  | 74.06  | 1  |

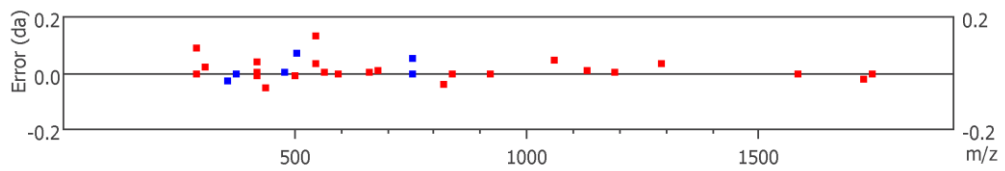

E

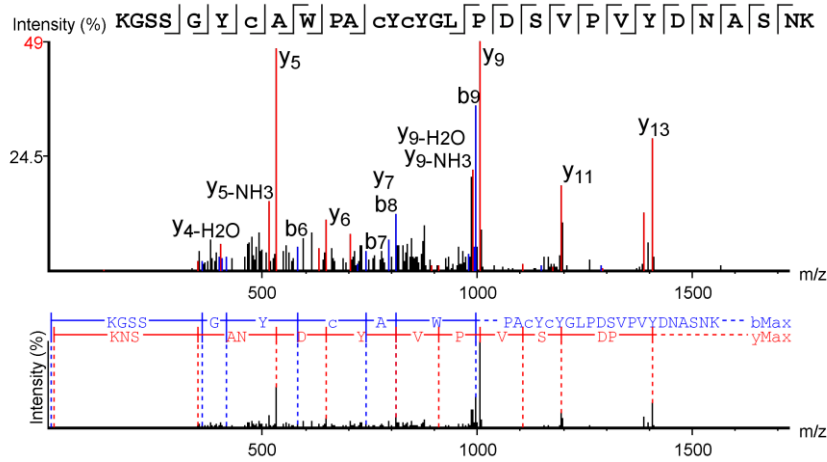

F

| #  | b       | b-H2O   | b-NH3   | b (2+)  | Seq       | y       | y-H2O   | y-NH3   | y (2+)  | #  |
|----|---------|---------|---------|---------|-----------|---------|---------|---------|---------|----|
| 1  | 129.10  | 111.09  | 112.08  | 65.05   | K         |         |         |         |         | 30 |
| 2  | 186.12  | 168.11  | 169.10  | 93.56   | G         | 3258.36 | 3240.35 | 3241.33 | 1629.68 | 29 |
| 3  | 273.16  | 255.15  | 256.13  | 137.08  | S         | 3201.34 | 3183.33 | 3184.31 | 1601.17 | 28 |
| 4  | 360.14  | 342.18  | 343.16  | 180.59  | S         | 3114.31 | 3096.30 | 3097.28 | 1557.65 | 27 |
| 5  | 417.17  | 399.20  | 400.18  | 209.10  | G         | 3027.27 | 3009.26 | 3010.25 | 1514.14 | 26 |
| 6  | 580.25  | 562.26  | 563.25  | 290.64  | Y         | 2970.25 | 2952.24 | 2953.23 | 1485.63 | 25 |
| 7  | 740.33  | 722.33  | 723.28  | 370.65  | C(+57.02) | 2807.19 | 2789.18 | 2790.16 | 1404.09 | 24 |
| 8  | 811.35  | 793.31  | 794.33  | 406.16  | A         | 2647.16 | 2629.15 | 2630.13 | 1324.08 | 23 |
| 9  | 997.42  | 979.45  | 980.36  | 499.21  | W         | 2576.12 | 2558.11 | 2559.09 | 1288.58 | 22 |
| 10 | 1094.47 | 1076.46 | 1077.45 | 547.74  | P         | 2390.04 | 2372.03 | 2373.02 | 1195.52 | 21 |
| 11 | 1165.51 | 1147.46 | 1148.47 | 583.26  | A         | 2292.99 | 2274.98 | 2275.96 | 1146.99 | 20 |
| 12 | 1325.54 | 1307.53 | 1308.51 | 663.27  | C(+57.02) | 2221.95 | 2203.94 | 2204.93 | 1111.48 | 19 |
| 13 | 1488.60 | 1470.59 | 1471.58 | 744.80  | Y         | 2061.92 | 2043.91 | 2044.90 | 1031.46 | 18 |
| 14 | 1648.63 | 1630.62 | 1631.61 | 824.82  | C(+57.02) | 1898.86 | 1880.85 | 1881.83 | 949.93  | 17 |
| 15 | 1811.70 | 1793.69 | 1794.67 | 906.35  | Y         | 1738.83 | 1720.82 | 1721.80 | 869.91  | 16 |
| 16 | 1868.72 | 1850.71 | 1851.69 | 934.86  | G         | 1575.76 | 1557.75 | 1558.74 | 788.38  | 15 |
| 17 | 1981.80 | 1963.79 | 1964.78 | 991.43  | L         | 1518.74 | 1500.73 | 1501.72 | 759.87  | 14 |
| 18 | 2078.86 | 2060.85 | 2061.83 | 1039.93 | P         | 1405.66 | 1387.64 | 1388.64 | 703.30  | 13 |
| 19 | 2193.88 | 2175.87 | 2176.86 | 1097.44 | D         | 1308.61 | 1290.60 | 1291.50 | 654.80  | 12 |
| 20 | 2280.92 | 2262.90 | 2263.89 | 1140.96 | S         | 1193.60 | 1175.56 | 1176.55 | 597.29  | 11 |
| 21 | 2379.98 | 2361.97 | 2362.96 | 1190.49 | V         | 1106.47 | 1088.54 | 1089.52 | 553.77  | 10 |
| 22 | 2477.04 | 2459.03 | 2460.01 | 1239.02 | P         | 1007.47 | 989.47  | 990.46  | 504.24  | 9  |
| 23 | 2576.10 | 2558.09 | 2559.08 | 1288.58 | V         | 910.37  | 892.37  | 893.40  | 455.71  | 8  |
| 24 | 2739.17 | 2721.16 | 2722.14 | 1370.08 | Y         | 811.35  | 793.31  | 794.33  | 406.16  | 7  |
| 25 | 2854.20 | 2836.18 | 2837.17 | 1427.60 | D         | 648.28  | 630.22  | 631.28  | 324.65  | 6  |
| 26 | 2968.24 | 2950.23 | 2951.21 | 1484.62 | N         | 533.26  | 515.26  | 516.23  | 267.13  | 5  |
| 27 | 3039.28 | 3021.26 | 3022.25 | 1520.14 | A         | 419.22  | 401.15  | 402.20  | 210.11  | 4  |
| 28 | 3126.31 | 3108.30 | 3109.28 | 1563.65 | S         | 348.21  | 330.18  | 331.16  | 174.59  | 3  |
| 29 | 3240.35 | 3222.34 | 3223.32 | 1620.68 | N         | 261.16  | 243.15  | 244.13  | 131.22  | 2  |
| 30 |         |         |         |         | K         | 147.11  | 129.10  | 130.09  | 74.06   | 1  |

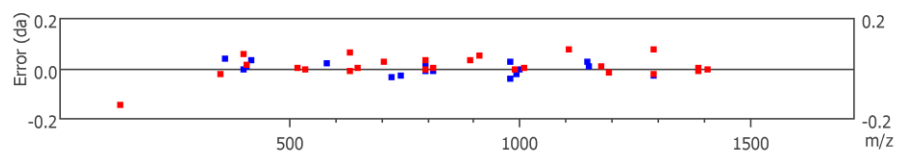

**Figure S2.** Tryptic peptides identified for Tbah02791 (Toxin Tb4) protein. (A) Annotated spectrum with alignment of the ion 575.77 2+ and its (B) ion table and error map. (C) Annotated spectrum with alignment of the ion 652.89 3+ and its (D) ion table and error map. (E) Annotated spectrum with alignment of the ion 1129.48 3+ and its (F) ion table and error map.

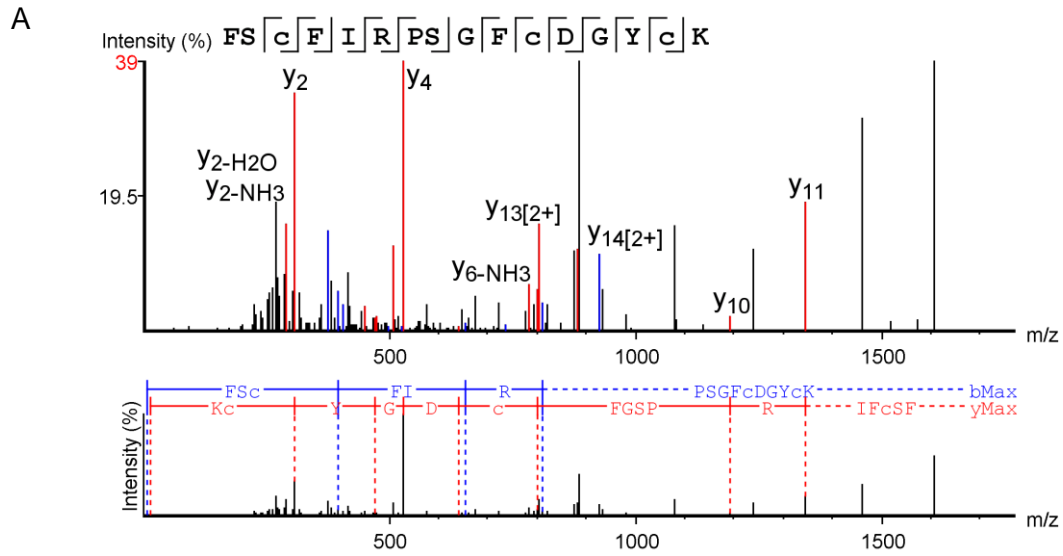

**B**

| #  | b             | b-H <sub>2</sub> O | b-NH <sub>3</sub> | b (2+)        | Seq       | y              | y-H <sub>2</sub> O | y-NH <sub>3</sub> | y (2+)        | #  |
|----|---------------|--------------------|-------------------|---------------|-----------|----------------|--------------------|-------------------|---------------|----|
| 1  | 148.08        | 130.07             | 131.05            | 74.54         | F         |                |                    |                   |               | 16 |
| 2  | 235.11        | 217.10             | 218.08            | 118.05        | S         | 1853.78        | 1835.77            | 1836.75           | 927.39        | 15 |
| 3  | <b>395.16</b> | <b>377.13</b>      | 378.11            | 198.07        | C(+57.02) | 1766.74        | 1748.73            | 1749.72           | <b>883.92</b> | 14 |
| 4  | 542.21        | <b>524.17</b>      | 525.18            | 271.60        | F         | 1606.71        | 1588.70            | 1589.69           | <b>803.92</b> | 13 |
| 5  | <b>655.25</b> | 637.28             | 638.26            | 328.15        | I         | 1459.65        | 1441.64            | 1442.62           | 730.32        | 12 |
| 6  | <b>811.35</b> | 793.38             | 794.37            | <b>406.24</b> | R         | <b>1346.62</b> | 1328.55            | 1329.53           | 673.78        | 11 |
| 7  | 908.45        | 890.43             | 891.42            | 454.72        | P         | <b>1190.40</b> | 1172.45            | 1173.43           | 595.73        | 10 |
| 8  | 995.48        | 977.47             | 978.45            | <b>498.21</b> | S         | 1093.41        | 1075.40            | 1076.38           | 547.20        | 9  |
| 9  | 1052.50       | 1034.49            | 1035.47           | 526.75        | G         | 1006.38        | 988.37             | 989.35            | 503.69        | 8  |
| 10 | 1199.57       | 1181.56            | 1182.54           | 600.28        | F         | 949.35         | 931.34             | 932.33            | <b>475.22</b> | 7  |
| 11 | 1359.60       | 1341.59            | 1342.57           | 680.30        | C(+57.02) | <b>802.29</b>  | 784.28             | <b>785.27</b>     | 401.64        | 6  |
| 12 | 1474.62       | 1456.61            | 1457.60           | <b>737.81</b> | D         | <b>642.25</b>  | 624.24             | 625.23            | 321.63        | 5  |
| 13 | 1531.65       | 1513.64            | 1514.62           | 766.32        | G         | <b>527.23</b>  | <b>509.17</b>      | 510.20            | 264.11        | 4  |
| 14 | 1694.71       | 1676.70            | 1677.68           | 847.85        | Y         | <b>470.22</b>  | <b>452.15</b>      | 453.18            | 235.60        | 3  |
| 15 | 1854.74       | 1836.73            | 1837.71           | <b>927.87</b> | C(+57.02) | <b>307.15</b>  | <b>289.15</b>      | <b>290.10</b>     | 154.07        | 2  |
| 16 |               |                    |                   |               | K         | 147.11         | 129.10             | 130.09            | 74.06         | 1  |

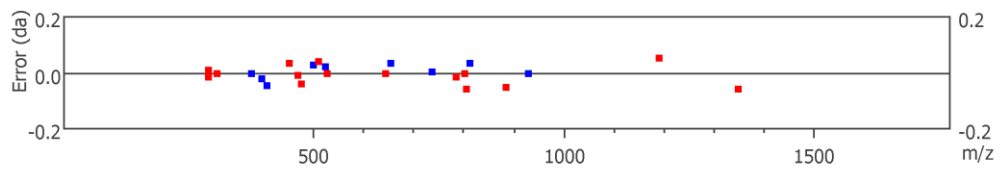

C

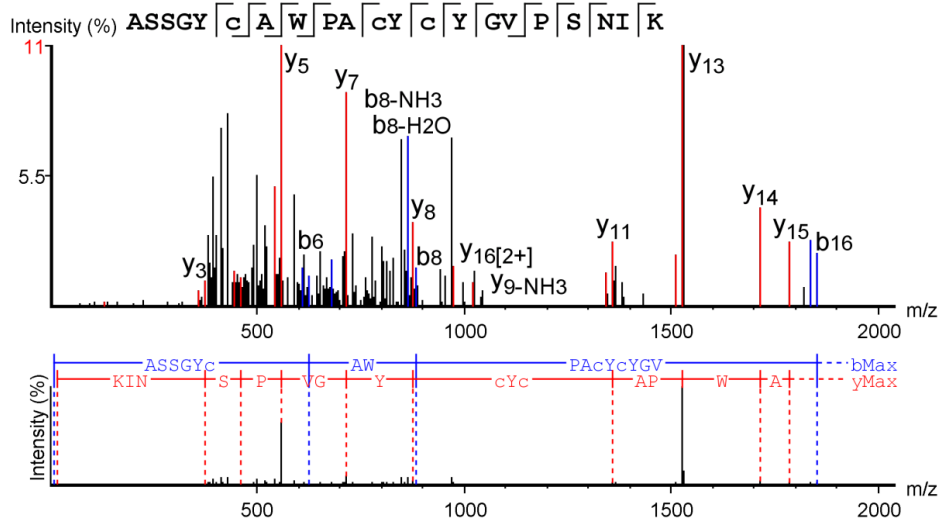

D

| #  | b              | b-H <sub>2</sub> O | b-NH <sub>3</sub> | b(2+)   | Seq       | y              | y-H <sub>2</sub> O | y-NH <sub>3</sub> | y(2+)         | #  |
|----|----------------|--------------------|-------------------|---------|-----------|----------------|--------------------|-------------------|---------------|----|
| 1  | 72.04          | 54.03              | 55.02             | 36.52   | A         |                |                    |                   |               | 21 |
| 2  | 159.08         | 141.07             | 142.05            | 80.04   | S         | 2339.99        | 2321.98            | 2322.96           | 1170.49       | 20 |
| 3  | 246.11         | 228.10             | 229.08            | 123.55  | S         | 2252.96        | 2234.95            | 2235.93           | 1126.98       | 19 |
| 4  | 303.13         | 285.12             | 286.10            | 152.07  | G         | 2165.92        | 2147.91            | 2148.90           | 1083.46       | 18 |
| 5  | 466.19         | 448.18             | 449.17            | 233.60  | Y         | 2108.90        | 2090.89            | 2091.88           | 1054.95       | 17 |
| 6  | <b>626.20</b>  | <b>608.21</b>      | 609.20            | 313.61  | C(+57.02) | 1945.84        | 1927.83            | 1928.81           | <b>973.37</b> | 16 |
| 7  | 697.26         | <b>679.22</b>      | 680.23            | 349.13  | A         | <b>1785.82</b> | 1767.80            | 1768.78           | 893.40        | 15 |
| 8  | <b>883.32</b>  | <b>865.32</b>      | <b>866.32</b>     | 442.17  | W         | <b>1714.75</b> | 1696.76            | 1697.74           | 857.89        | 14 |
| 9  | 980.39         | 962.38             | 963.37            | 490.70  | P         | <b>1528.69</b> | <b>1510.76</b>     | <b>1511.67</b>    | 764.85        | 13 |
| 10 | 1051.43        | 1033.42            | 1034.40           | 526.22  | A         | 1431.64        | 1413.63            | 1414.61           | 716.32        | 12 |
| 11 | 1211.46        | 1193.45            | 1194.43           | 606.23  | C(+57.02) | <b>1360.63</b> | 1342.59            | <b>1343.54</b>    | 680.80        | 11 |
| 12 | 1374.52        | 1356.51            | 1357.50           | 687.76  | Y         | 1200.57        | 1182.56            | 1183.54           | 600.79        | 10 |
| 13 | 1534.56        | 1516.54            | 1517.53           | 767.78  | C(+57.02) | 1037.51        | 1019.50            | <b>1020.47</b>    | 519.25        | 9  |
| 14 | 1697.62        | 1679.61            | 1680.59           | 849.31  | Y         | <b>877.47</b>  | 859.47             | 860.45            | 439.24        | 8  |
| 15 | 1754.64        | 1736.63            | 1737.61           | 877.82  | G         | <b>714.41</b>  | 696.40             | 697.39            | 357.71        | 7  |
| 16 | <b>1853.79</b> | <b>1835.71</b>     | <b>1836.71</b>    | 927.35  | V         | 657.39         | 639.38             | 640.37            | 329.20        | 6  |
| 17 | 1950.76        | 1932.75            | 1933.73           | 975.88  | P         | <b>558.33</b>  | 540.31             | <b>541.32</b>     | 279.66        | 5  |
| 18 | 2037.79        | 2019.78            | 2020.77           | 1019.40 | S         | <b>461.19</b>  | 443.26             | <b>444.24</b>     | 231.14        | 4  |
| 19 | 2151.84        | 2133.83            | 2134.81           | 1076.42 | N         | <b>374.26</b>  | 356.23             | <b>357.25</b>     | 187.62        | 3  |
| 20 | 2264.92        | 2246.91            | 2247.89           | 1132.96 | I         | 260.20         | 242.19             | 243.17            | 130.60        | 2  |
| 21 |                |                    |                   |         | K         | 147.11         | 129.10             | <b>130.21</b>     | 74.06         | 1  |

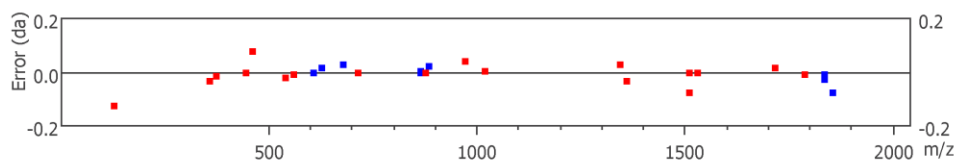

E

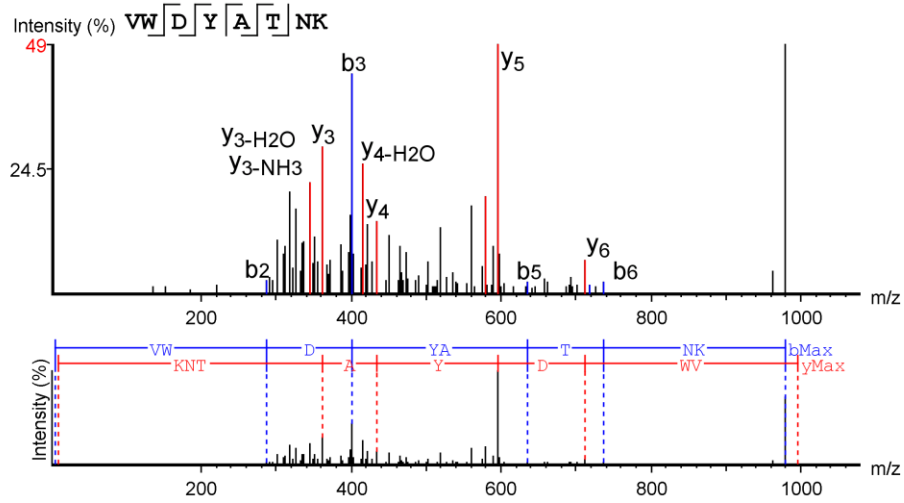

F

| # | b      | b-H2O  | b-NH3  | b (2+) | Seq | y      | y-H2O  | y-NH3  | y (2+) | # |
|---|--------|--------|--------|--------|-----|--------|--------|--------|--------|---|
| 1 | 100.08 | 82.07  | 83.05  | 50.54  | V   |        |        |        |        | 8 |
| 2 | 286.14 | 268.14 | 269.13 | 143.58 | W   | 897.41 | 879.40 | 880.38 | 449.21 | 7 |
| 3 | 401.18 | 383.17 | 384.16 | 201.09 | D   | 711.29 | 693.32 | 694.30 | 356.17 | 6 |
| 4 | 564.25 | 546.24 | 547.22 | 282.62 | Y   | 596.32 | 578.29 | 579.29 | 298.65 | 5 |
| 5 | 635.31 | 617.27 | 618.26 | 318.14 | A   | 433.17 | 415.15 | 416.21 | 217.12 | 4 |
| 6 | 736.30 | 718.38 | 719.30 | 368.67 | T   | 362.16 | 344.17 | 345.21 | 181.60 | 3 |
| 7 | 850.37 | 832.36 | 833.35 | 425.69 | N   | 261.16 | 243.15 | 244.13 | 131.08 | 2 |
| 8 |        |        |        |        | K   | 147.11 | 129.10 | 130.09 | 74.06  | 1 |

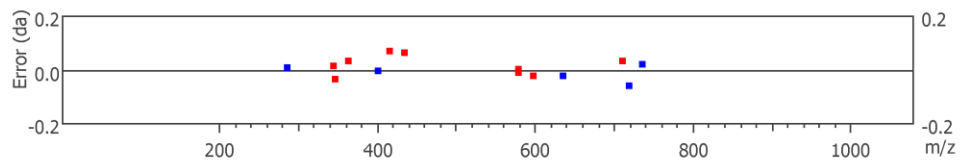

**Figure S3.** Tryptic peptides identified for Tbah02765 (Toxin Tb2 II) protein. (A) Annotated spectrum with alignment of the ion 667.62 3+ and its (B) ion table and error map. (C) Annotated spectrum with alignment of the ion 1205.935 2+ and its (D) ion table and error map. (E) Annotated spectrum with alignment of the ion 996.509 1+ and its (F) ion table and error map.

A

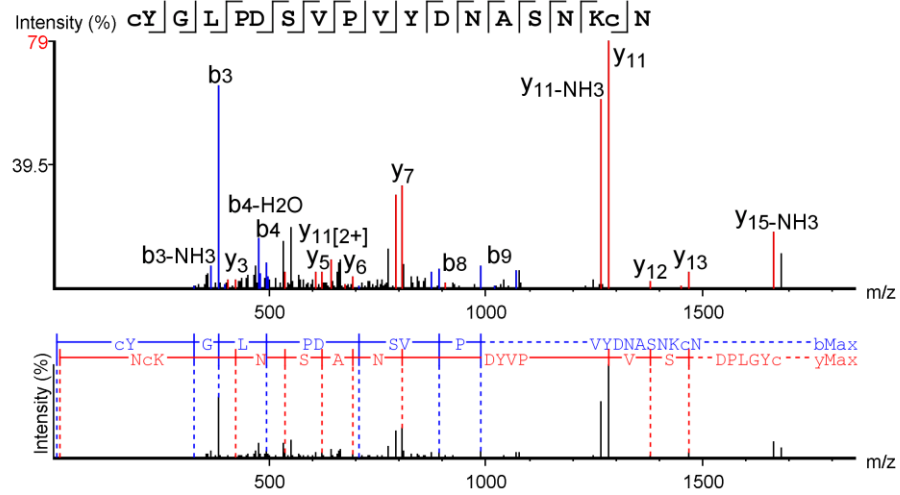

B

| #  | b       | b-H2O   | b-NH3   | b (2+)  | Seq       | y       | y-H2O   | y-NH3   | y (2+)  | #  |
|----|---------|---------|---------|---------|-----------|---------|---------|---------|---------|----|
| 1  | 161.04  | 143.03  | 144.01  | 81.02   | C(+57.02) |         |         |         |         | 19 |
| 2  | 324.02  | 306.09  | 307.07  | 162.55  | Y         | 2012.90 | 1994.89 | 1995.87 | 1006.95 | 18 |
| 3  | 381.12  | 363.11  | 364.11  | 191.06  | G         | 1849.84 | 1831.83 | 1832.81 | 925.42  | 17 |
| 4  | 494.19  | 476.21  | 477.15  | 247.60  | L         | 1792.82 | 1774.81 | 1775.79 | 896.91  | 16 |
| 5  | 591.26  | 573.25  | 574.23  | 296.13  | P         | 1679.73 | 1661.72 | 1662.67 | 840.37  | 15 |
| 6  | 706.21  | 688.28  | 689.26  | 353.64  | D         | 1582.68 | 1564.67 | 1565.65 | 791.84  | 14 |
| 7  | 793.32  | 775.31  | 776.29  | 397.08  | S         | 1467.60 | 1449.64 | 1450.58 | 734.33  | 13 |
| 8  | 892.36  | 874.33  | 875.37  | 446.69  | V         | 1380.61 | 1362.61 | 1363.59 | 690.81  | 12 |
| 9  | 989.45  | 971.43  | 972.41  | 495.25  | P         | 1281.52 | 1263.54 | 1264.49 | 641.25  | 11 |
| 10 | 1088.51 | 1070.41 | 1071.48 | 544.75  | V         | 1184.50 | 1166.49 | 1167.47 | 592.75  | 10 |
| 11 | 1251.57 | 1233.56 | 1234.54 | 626.29  | Y         | 1085.43 | 1067.42 | 1068.40 | 543.22  | 9  |
| 12 | 1366.60 | 1348.59 | 1349.57 | 683.80  | D         | 922.37  | 904.36  | 905.36  | 461.68  | 8  |
| 13 | 1480.64 | 1462.63 | 1463.61 | 740.82  | N         | 807.32  | 789.33  | 790.30  | 404.20  | 7  |
| 14 | 1551.68 | 1533.67 | 1534.65 | 776.34  | A         | 693.29  | 675.29  | 676.22  | 347.15  | 6  |
| 15 | 1638.71 | 1620.70 | 1621.68 | 819.86  | S         | 622.26  | 604.25  | 605.21  | 311.63  | 5  |
| 16 | 1752.75 | 1734.74 | 1735.73 | 876.88  | N         | 535.21  | 517.22  | 518.20  | 268.11  | 4  |
| 17 | 1880.85 | 1862.84 | 1863.82 | 940.92  | K         | 421.15  | 403.16  | 404.20  | 211.09  | 3  |
| 18 | 2040.88 | 2022.87 | 2023.85 | 1020.88 | C(+57.02) | 293.09  | 275.08  | 276.06  | 147.05  | 2  |
| 19 |         |         |         |         | N         | 133.06  | 115.05  | 116.03  | 67.03   | 1  |

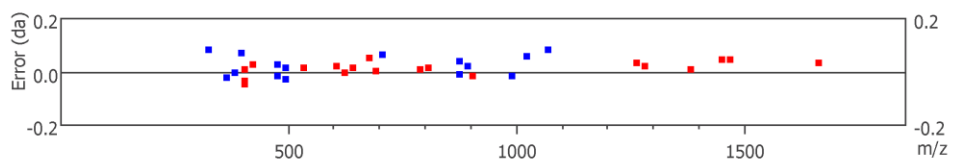



C

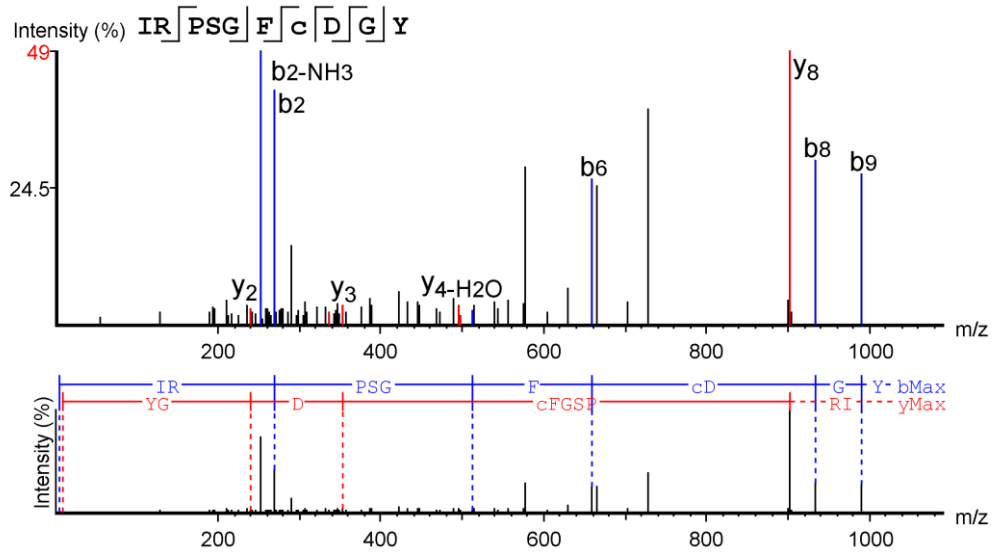

D

| #  | b      | b-H2O  | b-NH3  | b (2+) | Seq       | y       | y-H2O   | y-NH3   | y (2+) | #  |
|----|--------|--------|--------|--------|-----------|---------|---------|---------|--------|----|
| 1  | 114.09 | 96.08  | 97.06  | 57.55  | I         |         |         |         |        | 10 |
| 2  | 270.20 | 252.18 | 253.12 | 135.60 | R         | 1058.44 | 1040.43 | 1041.41 | 529.72 | 9  |
| 3  | 367.25 | 349.24 | 350.22 | 184.12 | P         | 902.32  | 884.32  | 885.31  | 451.67 | 8  |
| 4  | 454.28 | 436.27 | 437.25 | 227.64 | S         | 805.28  | 787.27  | 788.26  | 403.14 | 7  |
| 5  | 511.43 | 493.29 | 494.27 | 256.15 | G         | 718.25  | 700.24  | 701.22  | 359.63 | 6  |
| 6  | 658.32 | 640.36 | 641.34 | 329.68 | F         | 661.23  | 643.22  | 644.20  | 331.11 | 5  |
| 7  | 818.40 | 800.39 | 801.37 | 409.70 | C(+57.02) | 514.16  | 496.16  | 497.15  | 257.58 | 4  |
| 8  | 933.35 | 915.41 | 916.40 | 467.21 | D         | 354.07  | 336.12  | 337.10  | 177.56 | 3  |
| 9  | 990.43 | 972.44 | 973.42 | 495.72 | G         | 239.05  | 221.09  | 222.08  | 120.05 | 2  |
| 10 |        |        |        |        | Y         | 182.08  | 164.07  | 165.05  | 91.54  | 1  |

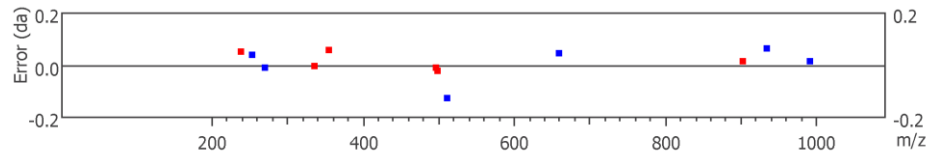

E

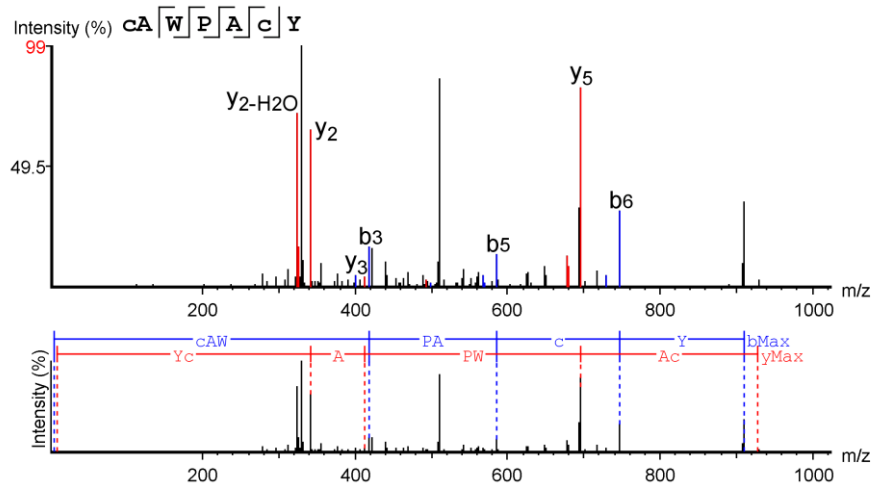

F

| # | b      | b-H2O  | b-NH3  | b (2+) | Seq       | y      | y-H2O  | y-NH3  | y (2+) | # |
|---|--------|--------|--------|--------|-----------|--------|--------|--------|--------|---|
| 1 | 161.04 | 143.03 | 144.01 | 81.02  | C(+57.02) |        |        |        |        | 7 |
| 2 | 232.08 | 214.07 | 215.05 | 116.54 | A         | 767.32 | 749.31 | 750.29 | 384.16 | 6 |
| 3 | 418.09 | 400.17 | 401.17 | 209.58 | W         | 696.25 | 678.21 | 679.23 | 348.64 | 5 |
| 4 | 515.21 | 497.20 | 498.14 | 258.10 | P         | 510.20 | 492.11 | 493.17 | 255.60 | 4 |
| 5 | 586.18 | 568.21 | 569.23 | 293.62 | A         | 413.14 | 395.14 | 396.12 | 207.07 | 3 |
| 6 | 746.24 | 728.23 | 729.25 | 373.64 | C(+57.02) | 342.07 | 324.08 | 325.14 | 171.56 | 2 |
| 7 |        |        |        |        | Y         | 182.08 | 164.07 | 165.05 | 91.54  | 1 |

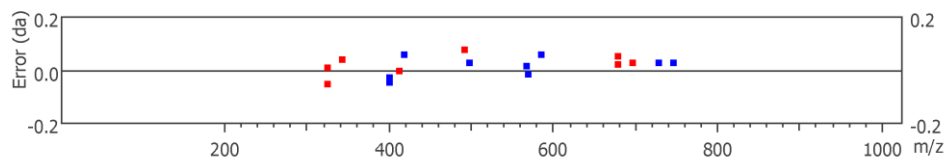

**Figure S4.** Chymotryptic peptides identified for Tbah02791 (Toxin Tb4) and Tbah02765 (Toxin Tb2 II) proteins. (A) Annotated spectrum with alignment of the ion 586.244 2+ and its (B) ion table and error map identified for Tbah02791. (C) Annotated spectrum with alignment of the ion 1086.938 2+ and its (D) ion table and error map identified for Tbah02765. (E) Annotated spectrum with alignment of the ion 927.30 1+ and its (F) ion table and error map identified in both proteins.

A

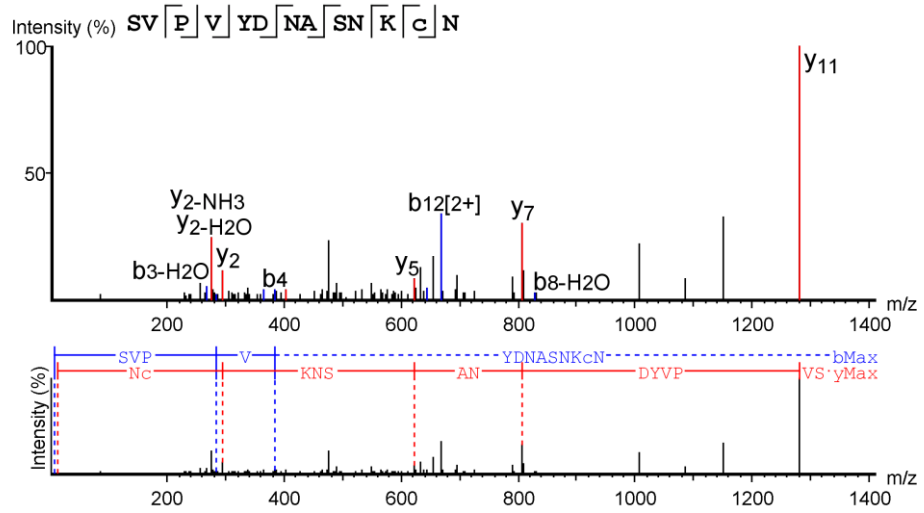

B

| #  | b       | b-H2O   | b-NH3   | b(2+)  | Seq       | y       | y-H2O   | y-NH3   | y(2+)  | #  |
|----|---------|---------|---------|--------|-----------|---------|---------|---------|--------|----|
| 1  | 88.04   | 70.03   | 71.01   | 44.52  | S         |         |         |         |        | 13 |
| 2  | 187.11  | 169.10  | 170.08  | 94.05  | V         | 1380.62 | 1362.61 | 1363.59 | 690.81 | 12 |
| 3  | 284.11  | 266.06  | 267.13  | 142.58 | P         | 1281.58 | 1263.54 | 1264.53 | 641.28 | 11 |
| 4  | 383.26  | 365.23  | 366.20  | 192.11 | V         | 1184.50 | 1166.49 | 1167.47 | 592.75 | 10 |
| 5  | 546.29  | 528.28  | 529.27  | 273.65 | Y         | 1085.43 | 1067.42 | 1068.40 | 543.22 | 9  |
| 6  | 661.32  | 643.33  | 644.29  | 331.16 | D         | 922.37  | 904.36  | 905.34  | 461.68 | 8  |
| 7  | 775.36  | 757.35  | 758.34  | 388.18 | N         | 807.35  | 789.33  | 790.31  | 404.17 | 7  |
| 8  | 846.40  | 828.32  | 829.37  | 423.70 | A         | 693.30  | 675.29  | 676.27  | 347.15 | 6  |
| 9  | 933.43  | 915.42  | 916.40  | 467.22 | S         | 622.26  | 604.25  | 605.23  | 311.63 | 5  |
| 10 | 1047.47 | 1029.46 | 1030.45 | 524.24 | N         | 535.23  | 517.22  | 518.20  | 268.11 | 4  |
| 11 | 1175.57 | 1157.56 | 1158.54 | 588.28 | K         | 421.19  | 403.19  | 404.16  | 211.09 | 3  |
| 12 | 1335.60 | 1317.59 | 1318.57 | 668.29 | C(+57.02) | 293.12  | 275.08  | 276.12  | 147.05 | 2  |
| 13 |         |         |         |        | N         | 133.06  | 115.05  | 116.03  | 67.03  | 1  |

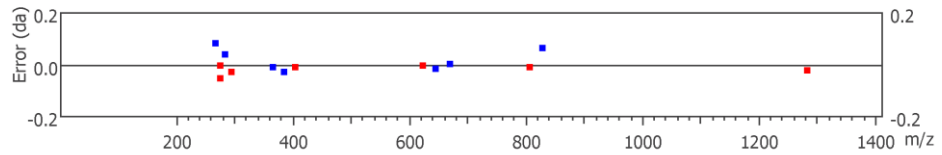

**Figure S5.** Chemical cleavage peptide identified for Tbah02791 (Toxin Tb4) protein. (A) Annotated spectrum with alignment of the ion 734.303 2+ and its (B) ion table and error map identified.

**Table S1.** List of peptides identified for Tbah02791 (Toxin Tb4) and Tbah02765 (Toxin Tb2 II) proteins.

| Protein Accession           | Cleavage                    | Peptide                                                       | -10lgP | Mass    | Length | ppm   | m/z       | z |
|-----------------------------|-----------------------------|---------------------------------------------------------------|--------|---------|--------|-------|-----------|---|
| Tbah02791<br>(Toxin Tb4)    | Trypsin                     | K.LTC(+57.02)*FFTGAGYC(+57.02)*DK.E                           | 69.51  | 1538.65 | 13     | -0.7  | 770.3334  | 2 |
|                             |                             | K.LTC(+57.02)*FFTGAGYC(+57.02)*DKEC(+57.02)*K.L               | 55.62  | 1955.82 | 16     | -75.8 | 652.8984  | 3 |
|                             |                             | K.KGSSGYC(+57.02)*AWPAC(+57.02)*YC(+57.02)*YGLPDSVPVYDNASNK.C | 42.75  | 3385.44 | 30     | -6.6  | 1129.4824 | 3 |
|                             |                             | G.GKEGYPTDKR.G                                                | 37.63  | 1149.57 | 10     | -37.7 | 575.7745  | 2 |
|                             |                             | K.EGYPTDKR.G                                                  | 24.92  | 964.46  | 8      | -36   | 483.2206  | 2 |
|                             | Chymotrypsin<br>Formic acid | G.GKEGYPTDK.R                                                 | 22.39  | 993.47  | 9      | -70.5 | 497.7106  | 2 |
|                             |                             | Y.C(+57.02)*AWPAC(+57.02)*Y.C                                 | 22.48  | 926.34  | 7      | -42.8 | 927.3091  | 1 |
|                             |                             | Y.C(+57.02)*YGLPDSVPVYDNASNKC(+57.02)*N.K                     | 16.96  | 2171.92 | 19     | -29.1 | 1086.9384 | 2 |
|                             |                             | T.SVPVYDNASNKC(+57.02)*N.A                                    | 20.32  | 1466.64 | 13     | -36.1 | 734.3038  | 2 |
|                             |                             | K.VWDYATNK.C                                                  | 33.92  | 995.47  | 8      | 30.6  | 996.509   | 1 |
| Tbah02765<br>(Toxin Tb2 II) | Trypsin                     | K.FSC(+57.02)*FIRPSGFC(+57.02)*DGYC(+57.02)*K.T               | 29.13  | 1999.83 | 16     | 2.2   | 667.6214  | 3 |
|                             |                             | K.ASSGYC(+57.02)*AWPAC(+57.02)*YC(+57.02)*YGVPSNIK.V          | 21.78  | 2410.01 | 21     | -66.8 | 1205.9358 | 2 |
|                             | Chymotrypsin                | F.IRPSGFC(+57.02)*DGY.C                                       | 23.3   | 1170.51 | 10     | -33   | 586.2444  | 2 |
|                             |                             | Y.C(+57.02)*AWPAC(+57.02)*Y.C                                 | 22.48  | 926.34  | 7      | -42.8 | 927.3091  | 1 |

\* +57.02: Carbamidomethylation.
